# Supplementary material for: Imaginal disc growth factor 4 regulates development and temperature adaptation in Bactrocera dorsalis
Source: PubMed Central journal article supplement (PMC6353879; doi:10.1038/s41598-018-37414-9), 2019-01-30
Supplement: 41598_2018_37414_MOESM1_ESM.pdf [file 41598_2018_37414_MOESM1_ESM.pdf]

1 **Imaginal disc growth factor 4 regulates development and temperature adaptation in**

2 ***Bactrocera dorsalis***

3

4 Xinyue Gu, Zhihong Li, Yun Su, Yan Zhao and Lijun Liu\*

5

6

7 <sup>1</sup>Department of Entomology, College of Plant Protection, China Agricultural University, Beijing

8 100193, China.

9

10

11

12 \*: Correspondence and requests for materials should be addressed to Lijun Liu. (email:

13 [ljiu@cau.edu.cn](mailto:ljiu@cau.edu.cn))

14

15

16

17 **Supplementary information**

18 **Figure S1. Phylogenetic analysis of *idgf4* from different insect species using Neighbor-Joining and**  
19 **Maximum-Likelihood methods.**

20 **Figure S2. Stability of four housekeeping genes of *B. dorsalis* in the whole bodies of larvae at**  
21 **different developmental stages evaluated by *geNorm*.**

22 **Table S1. Details of *IDGF4* protein sequences used for phylogenetic analysis.**

23 **Table S2. PCR amplification conditions.**

24 **Table S3. Details of silencing *idgf4* in the function study of pupal stage.**

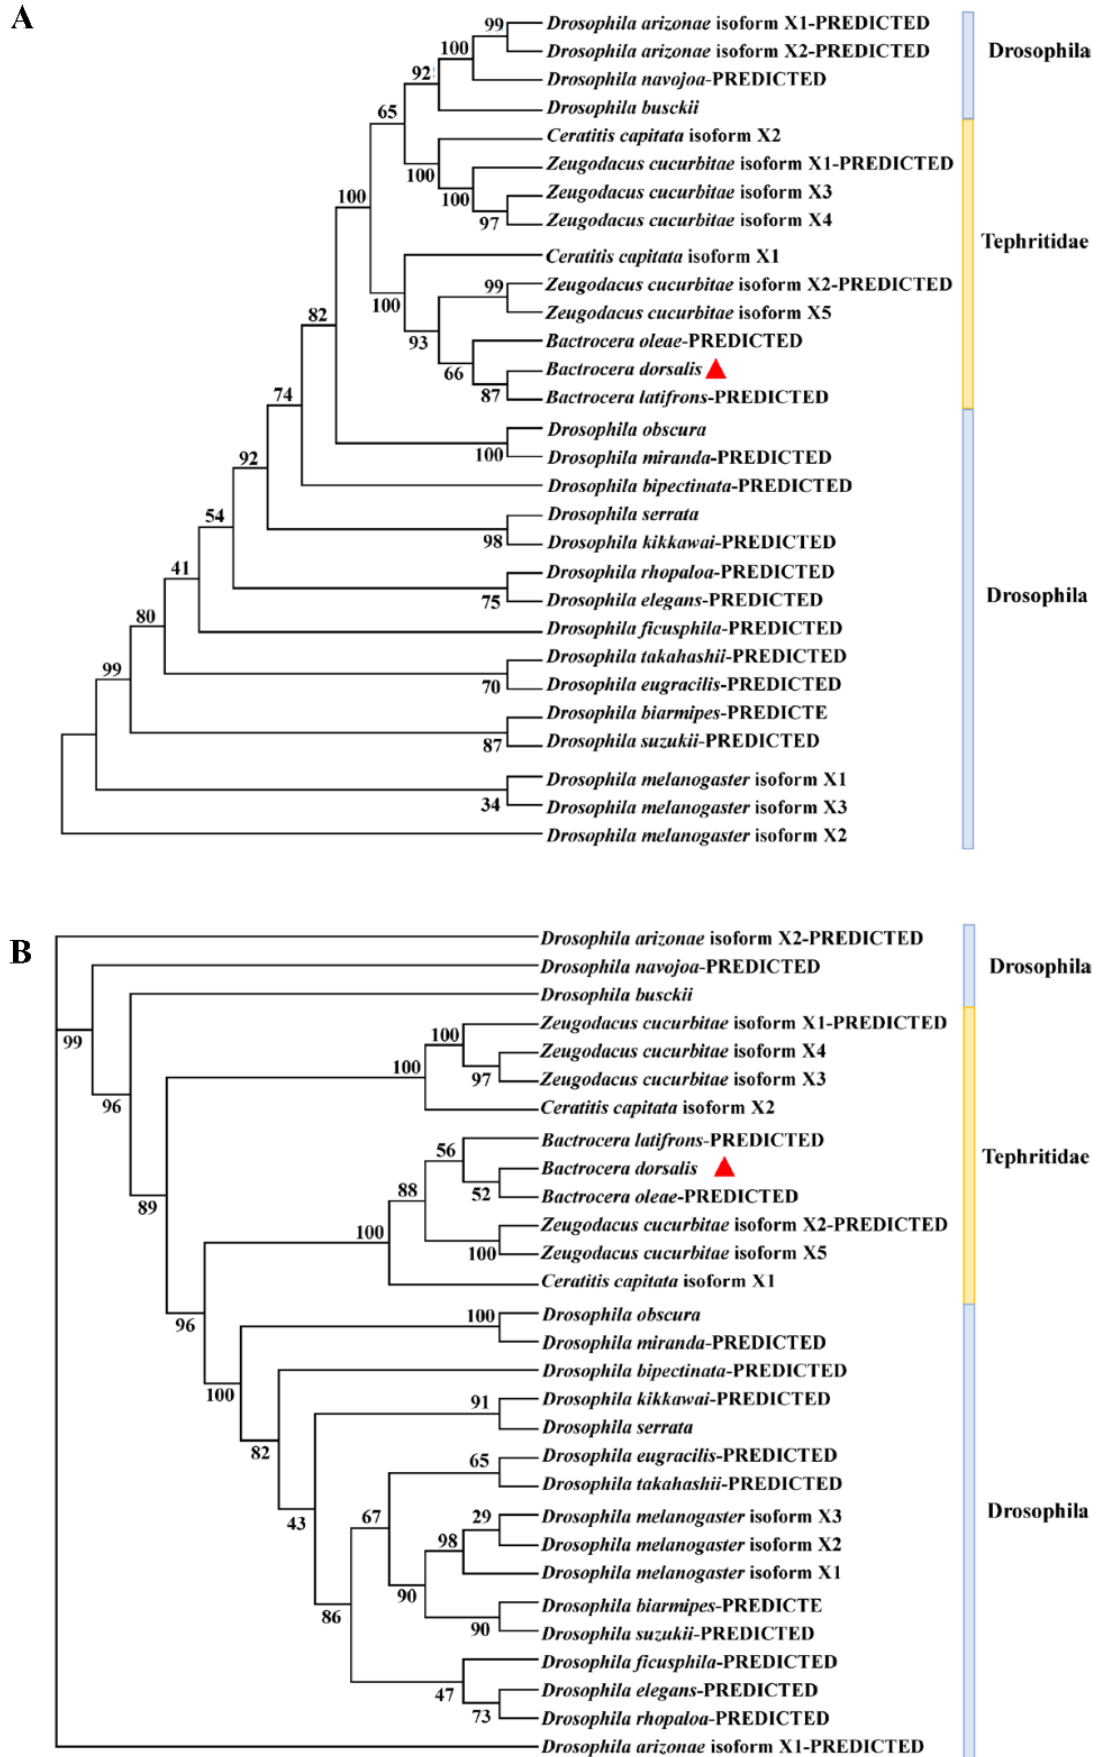

25

26

Figure S1. Phylogenetic analysis of *idgf4* from different insect species using Neighbor-

27           Joining and Maximum-Likelihood methods. A. The phylogenetic analysis of *idgf4* using the  
28           Neighbor-Joining method in MEGA. B. The phylogenetic analysis of *idgf4* using Maximum-  
29           Likelihood method in RAxML. One thousand bootstrap replications were used to test the  
30           topology in all cases. Percentage bootstrap values were reported on each cluster. The *B.*  
31           *dorsalis idgf4* we got is labeled with a red triangle. The amino acid and nucleotide sequences  
32           were downloaded from NCBI. The accession numbers of the genes are designated with the  
33           corresponding abbreviations and are listed in Table S1.  
34

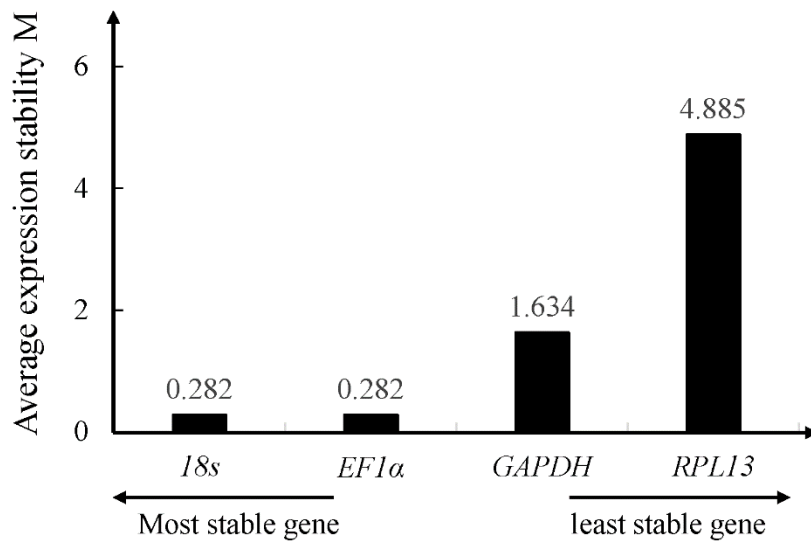

35

36

37

38

39

40

**Figure S2. Stability of four housekeeping genes of *B. dorsalis* in the whole bodies of larvae at different developmental stages evaluated by *geNorm*.** Four different developmental stages were used including 1st-instar larvae, early 3rd instar larvae (L3-1), 3-day pupae (P-E) and 10-day adults (A-M).

42 **Table S1. Details of *IDGF4* protein sequences used for phylogenetic analysis.**

| No. | Species                        | Name of <i>idgf4</i>                              | Accession Number                  |
|-----|--------------------------------|---------------------------------------------------|-----------------------------------|
| 1   | <i>Bactrocera dorsalis</i>     | <i>Bactrocera dorsalis</i>                        | MH250169                          |
| 2   | <i>Bactrocera latifrons</i>    | <i>Bactrocera latifrons</i> -PREDICTED            | XP_018800655.1/<br>JAI32325.1     |
| 3   | <i>Bactrocera oleae</i>        | <i>Bactrocera oleae</i> -PREDICTED                | XP_014099295.1                    |
| 4   | <i>Ceratitidis capitata</i>    | <i>Ceratitidis capitata</i> isoform X1            | JAB95810.1/<br>XP_004521633.1     |
| 5   | <i>Ceratitidis capitata</i>    | <i>Ceratitidis capitata</i> isoform X2            | XP_004520935.3                    |
| 6   | <i>Drosophila arizonae</i>     | <i>Drosophila arizonae</i> isoform X1-PREDICTED   | XP_017872388.1                    |
| 7   | <i>Drosophila arizonae</i>     | <i>Drosophila arizonae</i> isoform X2-PREDICTED   | XP_017872390.1                    |
| 8   | <i>Drosophila biarmipes</i>    | <i>Drosophila biarmipes</i> -PREDICTE             | XP_016954605.1                    |
| 9   | <i>Drosophila bipectinata</i>  | <i>Drosophila bipectinata</i> -PREDICTED          | XP_017094827.1                    |
| 10  | <i>Drosophila busckii</i>      | <i>Drosophila busckii</i>                         | ALC48324.1                        |
| 11  | <i>Drosophila elegans</i>      | <i>Drosophila elegans</i> -PREDICTED              | XP_017114436.1/<br>XP_017114435.1 |
| 12  | <i>Drosophila eugracilis</i>   | <i>Drosophila eugracilis</i> -PREDICTED           | XP_017064046.1                    |
| 13  | <i>Drosophila ficusphila</i>   | <i>Drosophila ficusphila</i> -PREDICTED           | XP_017055733.1                    |
| 14  | <i>Drosophila kikkawai</i>     | <i>Drosophila kikkawai</i> -PREDICTED             | XP_017030292.1                    |
| 15  | <i>Drosophila melanogaster</i> | <i>Drosophila melanogaster</i> isoform X1         | AAF46534.1                        |
| 16  | <i>Drosophila melanogaster</i> | <i>Drosophila melanogaster</i> isoform X2         | AAN09618.1                        |
| 17  | <i>Drosophila melanogaster</i> | <i>Drosophila melanogaster</i> isoform X3         | AHN59538.1                        |
| 18  | <i>Drosophila miranda</i>      | <i>Drosophila miranda</i> -PREDICTED              | XP_017156091.1                    |
| 19  | <i>Drosophila navojoa</i>      | <i>Drosophila navojoa</i> -PREDICTED              | XP_017965606.1                    |
| 20  | <i>Drosophila obscura</i>      | <i>Drosophila obscura</i>                         | XP_022234159.1                    |
| 21  | <i>Drosophila rhopaloa</i>     | <i>Drosophila rhopaloa</i> -PREDICTED             | XP_016988593.1                    |
| 22  | <i>Drosophila serrata</i>      | <i>Drosophila serrata</i>                         | XP_020802057.1                    |
| 23  | <i>Drosophila suzukii</i>      | <i>Drosophila suzukii</i> -PREDICTED              | XP_016937309.1                    |
| 24  | <i>Drosophila takahashii</i>   | <i>Drosophila takahashii</i> -PREDICTED           | XP_017012977.1                    |
| 25  | <i>Zeugodacus cucurbitae</i>   | <i>Zeugodacus cucurbitae</i> isoform X1-PREDICTED | XP_011189060.1                    |
| 26  | <i>Zeugodacus cucurbitae</i>   | <i>Zeugodacus cucurbitae</i> isoform X2-PREDICTED | XP_011185355.1                    |
| 27  | <i>Zeugodacus cucurbitae</i>   | <i>Zeugodacus cucurbitae</i> isoform X3           | JAD07329.1                        |
| 28  | <i>Zeugodacus cucurbitae</i>   | <i>Zeugodacus cucurbitae</i> isoform X4           | JAD02610.1                        |
| 29  | <i>Zeugodacus cucurbitae</i>   | <i>Zeugodacus cucurbitae</i> isoform X5           | JAD00079.1                        |

45 **Table S2. PCR amplification conditions.**

| <b>Primers pair</b>                                                                              | <b>Amplification conditions</b>                                                                |
|--------------------------------------------------------------------------------------------------|------------------------------------------------------------------------------------------------|
| <i>18s rRNA- rt &amp;<br/>Bd EFa1-rt &amp;<br/>Bd RPL13-rt&amp;<br/>Bd GAPDH-rt<br/>idgf4-rt</i> | 95 °C for 30 s; 40 cycles at 95 °C for 5 s, 52 °C for 34 s; 95 °C for 15 s; 52 °C for 60 s     |
| <i>Bd cloneidgf4-1</i>                                                                           | 95 °C for 2 min; 40 cycles at 95 °C for 30 s, 52 °C for 30 s, 72 °C for 60 s; 72 °C for 10 min |
| <i>Bd cloneidgf4-2</i>                                                                           | 95 °C for 2 min; 40 cycles at 95 °C for 30 s, 56 °C for 30 s, 72 °C for 60 s; 72 °C for 10 min |
| <i>Bd cloneidgf4-3</i>                                                                           | 95 °C for 2 min; 40 cycles at 95 °C for 30 s, 56 °C for 30 s, 72 °C for 60 s; 72 °C for 10 min |
| <i>Bd dsidgf4</i>                                                                                | 95 °C for 2 min; 40 cycles at 95 °C for 30 s, 54 °C for 30 s, 72 °C for 60 s; 72 °C for 10 min |

46

47

48

49 **Table S3. Detail number of individuals on silencing *idgf4* in the function study of pupal stage per**

50 **replicate.**

| treatment        | total number of insects per replicate | successful pupation per replicate | average of deformed individuals per replicate | average of smaller individuals per replicate | average of deformed wings per replicate | died individuals before sexual maturity |
|------------------|---------------------------------------|-----------------------------------|-----------------------------------------------|----------------------------------------------|-----------------------------------------|-----------------------------------------|
| <i>idgf4</i>     | 20                                    | 20                                | 3.50±0.96                                     | 1.50±0.50                                    | 2.00±0.82                               | 3.50±0.96                               |
| <i>GFP</i>       | 20                                    | 20                                | 0                                             | 0                                            | 0                                       | 0                                       |
| H <sub>2</sub> O | 20                                    | 20                                | 0                                             | 0                                            | 0                                       | 0                                       |

51
